# Supplementary material for: Combining porous organic polymers with chelating agents: a facile strategy to develop effective and multi-purpose absorbents for wastewater treatment
Source: Royal Society of Chemistry journal article supplement (doi:10.1039/d4nj04676e), 2024-11-13
Supplement: d4nj04676e1.pdf [file d4nj04676e1.pdf]

**Supplementary Information for:**

**Porous organic polymers marry with chelating agents: A facile strategy to develop effective and multi-purpose absorbents for wastewater treatment**

Jiyong Zhou <sup>†1</sup>, Yunze Chen <sup>†2</sup>, Liping Huang <sup>1</sup>, Lin Sun <sup>1</sup>, Jianhua Zhang<sup>3,4,\*</sup>

1 CNOOC Ener Tech-Drilling & Production Co., Tianjin 300452, China

2 CNOOC Tianjin Chemical Research and Design Institute Co., Ltd, Tianjin 300131, China

3 Department of Polymer Science and Engineering, Key Laboratory of Systems Bioengineering (Ministry of Education), School of Chemical Engineering and Technology, Tianjin University, Tianjin 300350, China.

4 Tianjin Key Laboratory of Membrane Science and Desalination Technology, Tianjin University, Tianjin 300350, China.

<sup>†</sup> Jiyong Zhou and Yunze Chen contributed equally to this work.

Corresponding author: Jianhua Zhang, *E-mail*: [jhuazhang@tju.edu.cn](mailto:jhuazhang@tju.edu.cn)

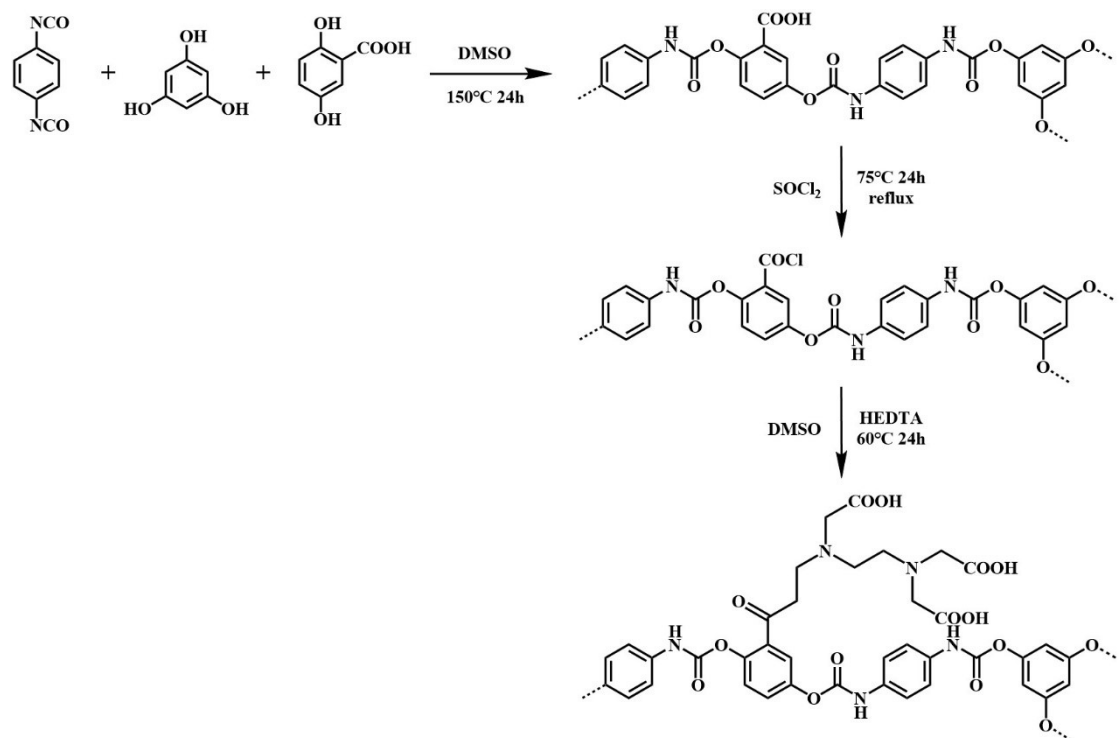

**Fig. S1** Preparation progress of CPOP-HEDTA

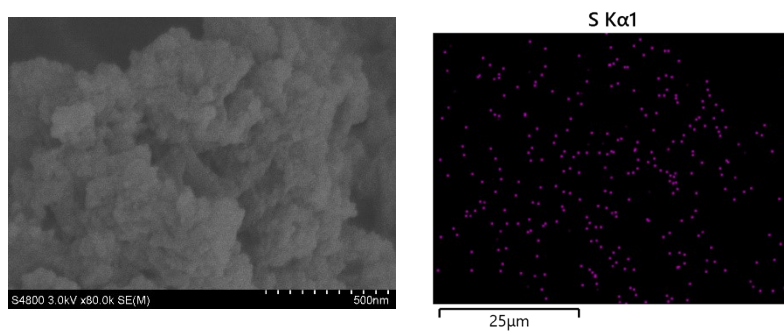

**Fig. S2** SEM and elemental mapping image of Sulfur in CPOP-HEDTA before adsorption.

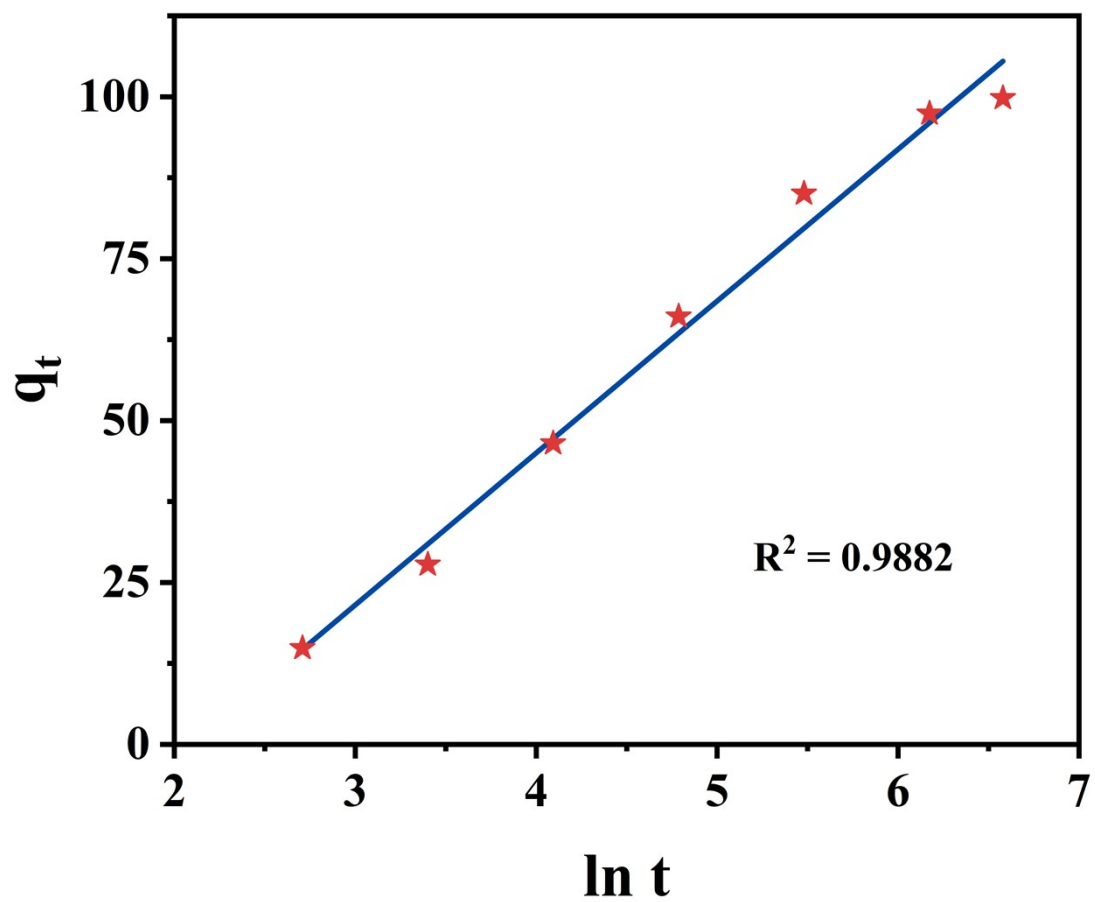

**Fig. S3** Elovich model for MB adsorption by CPOP-HEDTA

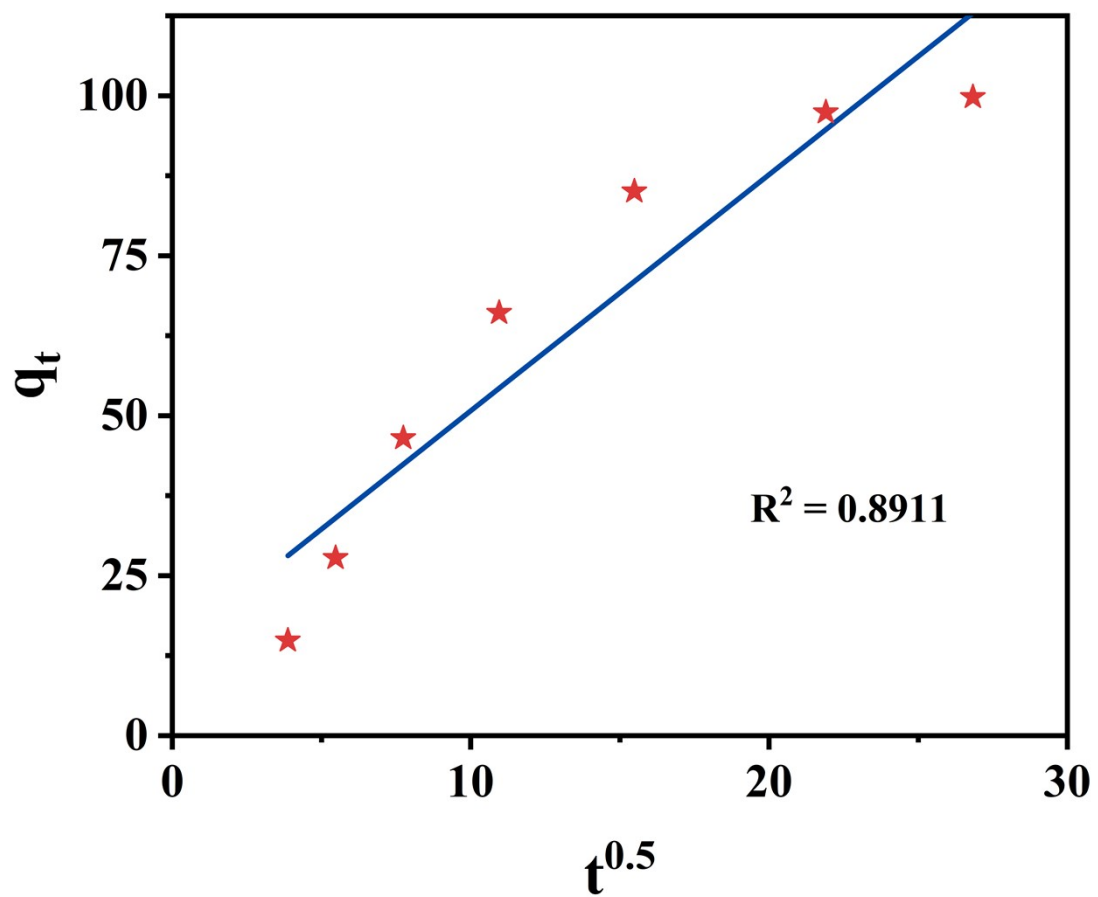

Fig. S4 Intraparticle diffusion model for MB adsorption by CPOP-HEDTA

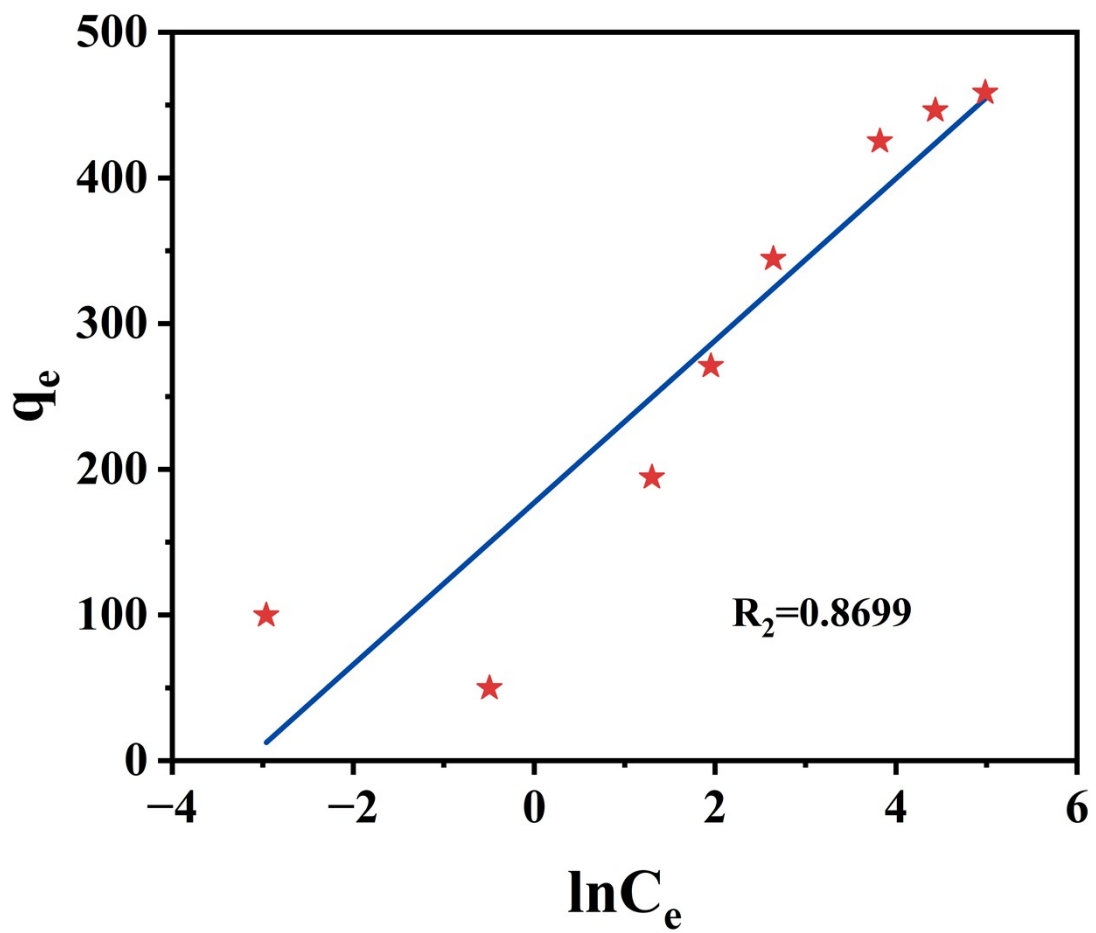

Fig. S5 Tempkin isotherm for MB adsorption by CPOP-HEDTA

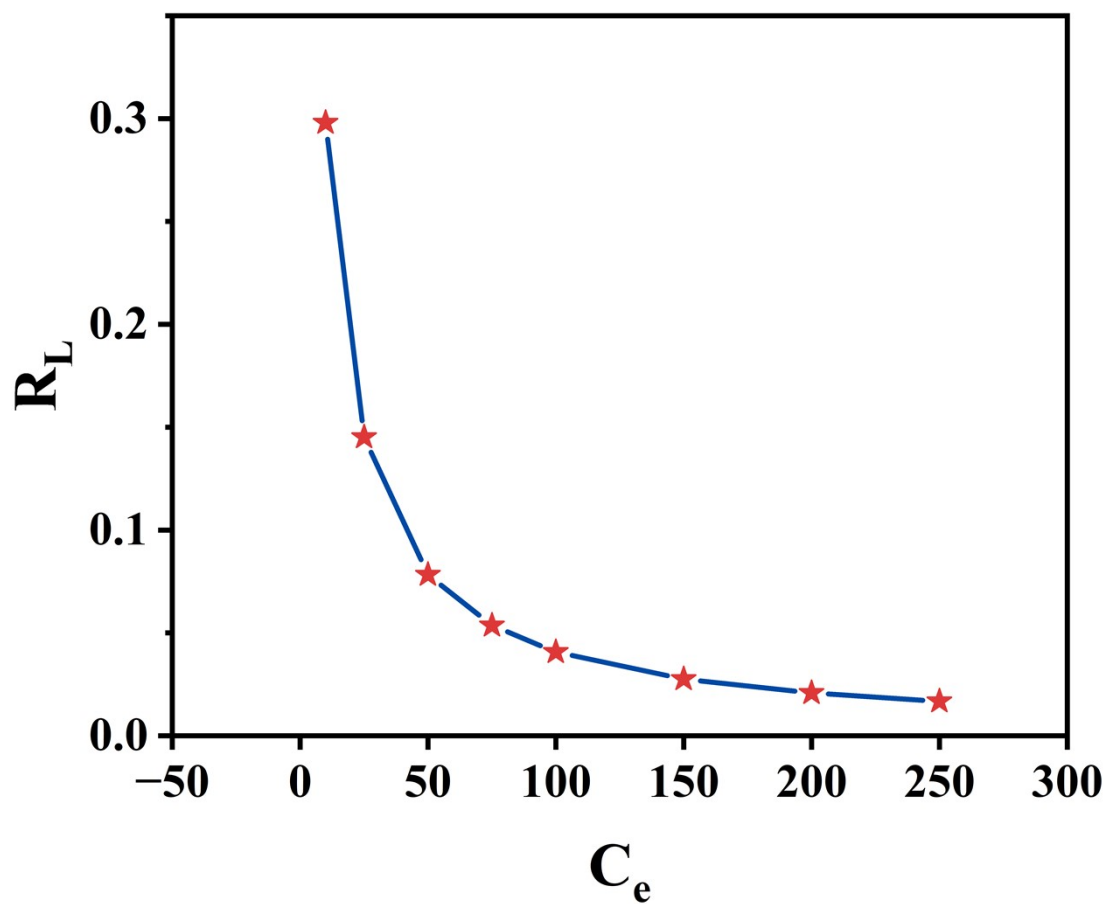

Fig. S6  $R_L$  with distinct initial concentrations for MB adsorption by CPOP-HEDTA

(A)

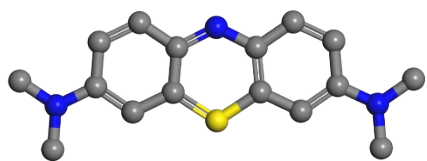

(B)

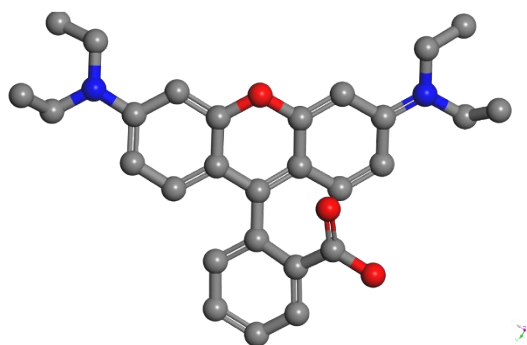

(C)

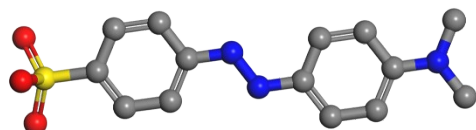

**Fig. S7** Ball-and-stick molecule model of (A) methylene blue (B) rhodamine B (C) methyl orange



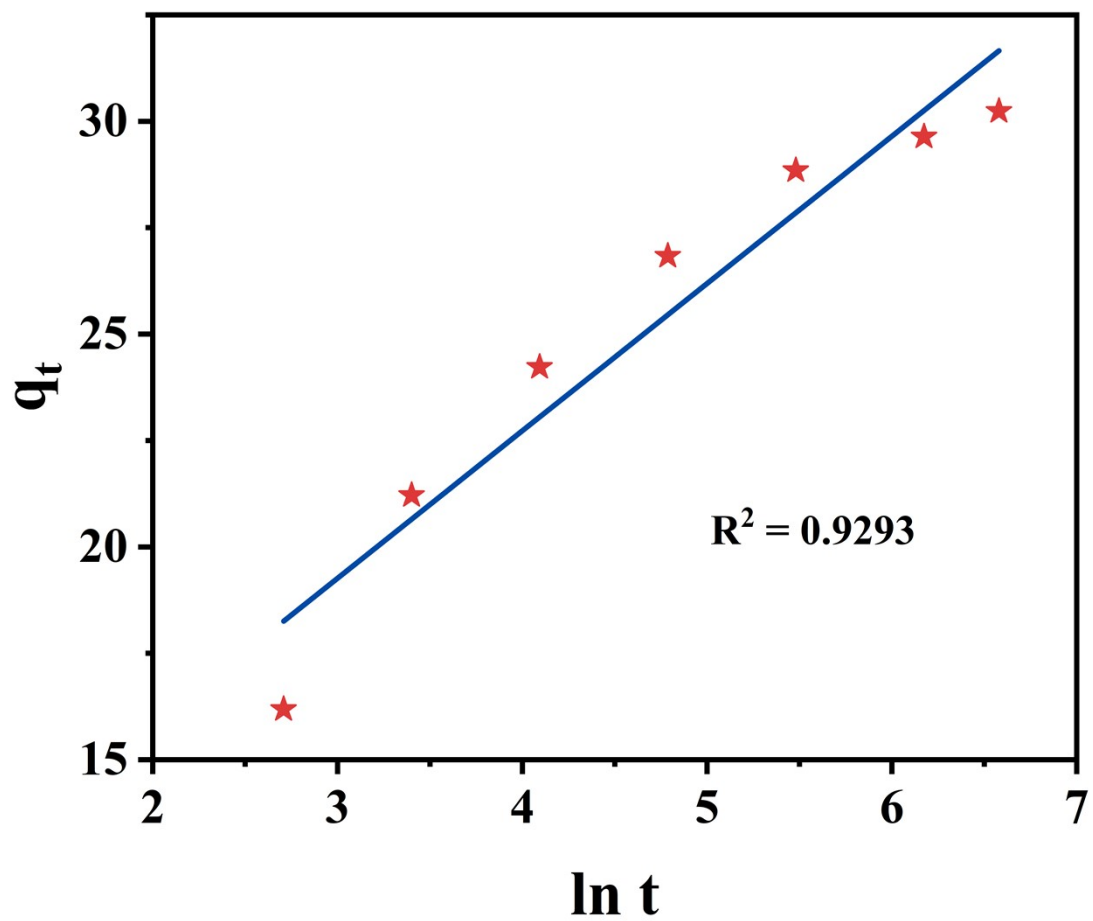

Fig. S8 Elovich model for  $\text{Fe}^{3+}$  adsorption by CPOP-HEDTA

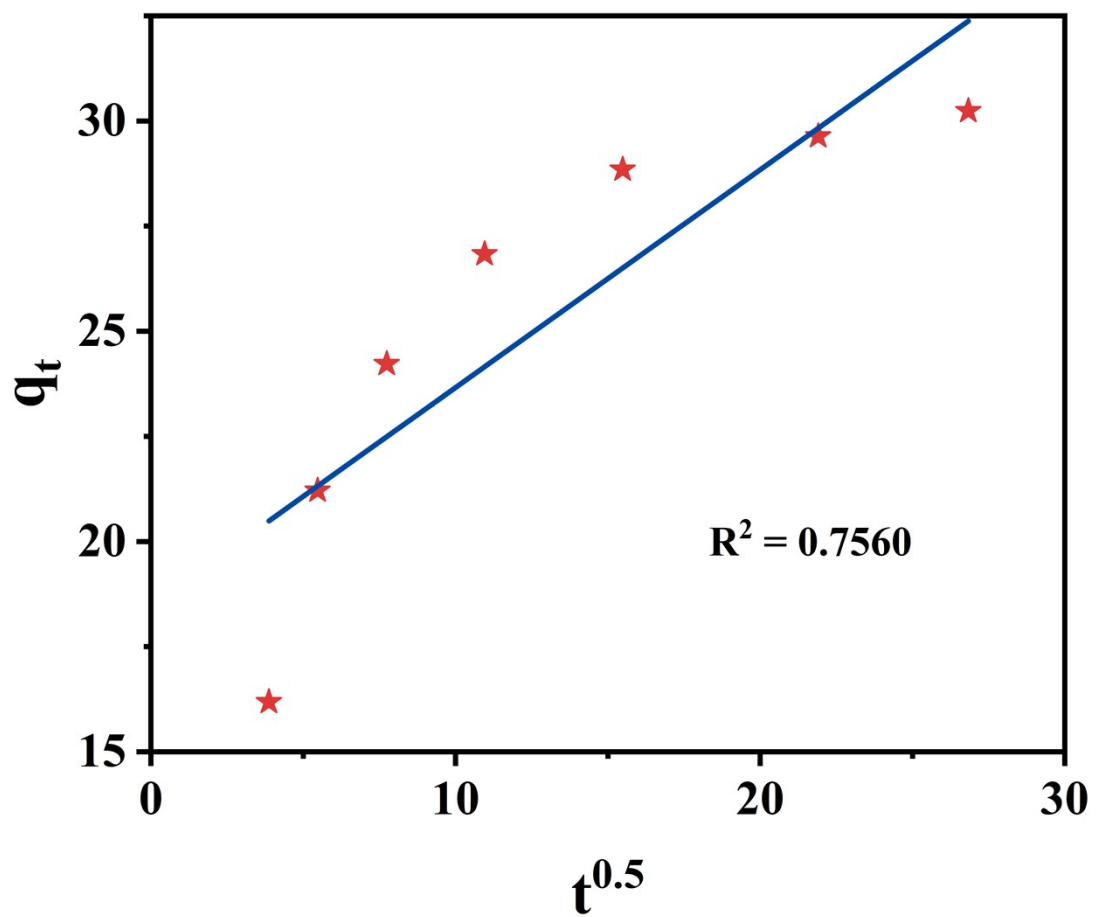

Fig. S9 Intraparticle diffusion model for  $\text{Fe}^{3+}$  adsorption by CPOP-HEDTA

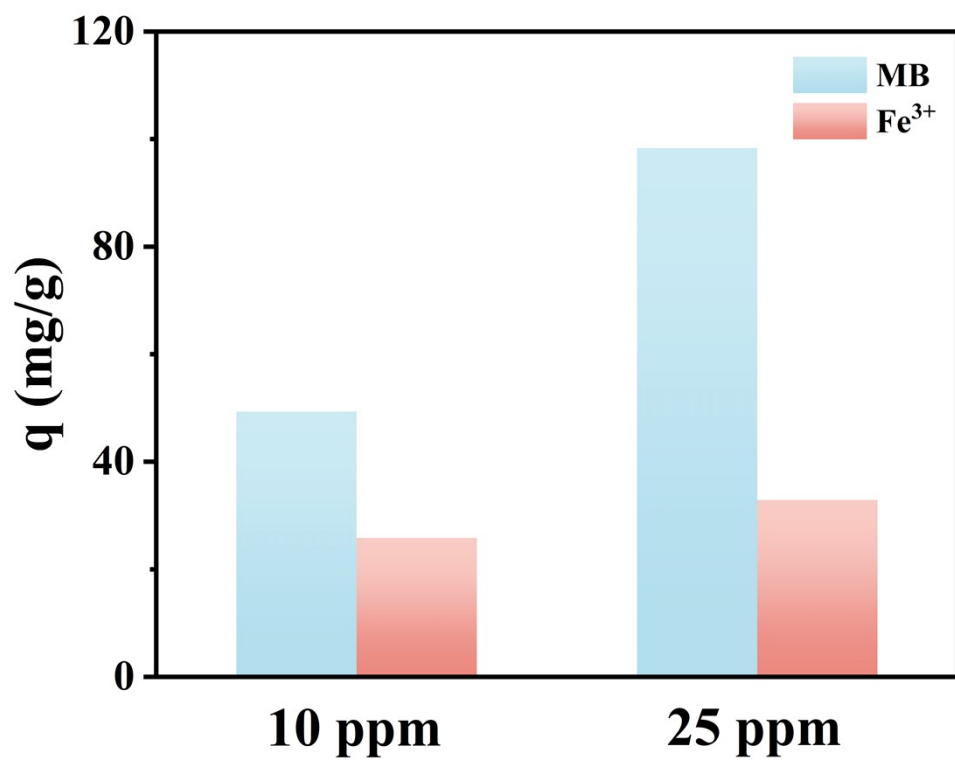

**Fig. S10** Synchronous adsorption capacities of MB and Fe<sup>3+</sup> on CPOP-HEDTA

The adsorption kinetics models were described as follows:

Pseudo-first-order kinetics model:  $\ln(q_e - q_t) = \ln q_e - k_1 t$  (Equation.S2)

Pseudo-second-order kinetics model:  $\frac{t}{q_t} = \frac{1}{k_2 q_e^2} + \frac{t}{q_e}$  (Equation.S3)

Elovich kinetics model:  $q_t = \frac{1}{\beta} \ln(\alpha\beta) + \frac{1}{\beta} \ln t$  (Equation.S3)

Intraparticle diffusion kinetics model:  $q_t = k_i t^{0.5} + C_i$  (Equation.S4)

Where,  $q_t$  (mg/g) and  $q_e$  (mg/g) are the adsorption capacity at a given time and at equilibrium respectively.  $k_1$  ( $\text{min}^{-1}$ ) and  $k_2$  ( $\text{g mg}^{-1} \text{min}^{-1}$ ) are the rate constants of pseudo-first-order and pseudo-second-order kinetics respectively.  $\alpha$  ( $\text{mg g}^{-1} \text{min}^{-1}$ ) is the initial adsorption rate in the chemisorption.  $\beta$  (g/mg) is a parameter that demonstrates the relation between the degree of surface coverage and activation energy in the chemisorption.  $k_i$  ( $\text{mg g}^{-1} \text{min}^{-0.5}$ ) is the constant of intraparticle diffusion.  $C_i$  is the constant of boundary layer affects and the adsorption kinetics is controlled by intraparticle diffusion diminutively when  $C_i = 0$ .

The adsorption isotherms were described as follows:

Langmuir isotherm:  $\frac{C_e}{q_e} = \frac{1}{k_L q_m} + \frac{C_e}{q_m}$  (Equation.S5)

$R_L = \frac{1}{1 + k_L C_0}$  (Equation.S6)

Freundlich isotherm:  $\ln q_e = \ln k_F + \frac{1}{n} \ln C_e$  (Equation.S7)

Tempkin isotherm:  $q_e = \beta \ln k_T + \beta \ln C_e$  (Equation.S8)

(Equation.S8)

$\beta = \frac{RT}{b}$  (Equation.S9)

Where,  $q_m$  (mg/g) is the theoretical maximum adsorption capacity and  $k_L$  is the constant energy relevant to the heat of adsorption calculated by Langmuir isotherms.  $C_e$  (mg/L) is the absorbate concentration in the liquid phase at equilibrium.  $q_e$  (mg/g) is the adsorption capacity at equilibrium.  $R_L$  is an essential separation factor of Langmuir isotherm defined as **Equation S6** showed. The value of  $R_L$  illustrates the type of isotherm,  $R_L > 1$  is unfavorable,  $R_L = 1$  is linear,  $1 > R_L > 0$  is favorable and  $R_L = 0$  is irreversible.

$k_F$  (mg/g) ( $\text{L/mg}$ )<sup>1/n</sup> represents the adsorption capacity while  $n$  represents the intensity of adsorption in Freundlich theory and the favorability of the adsorption.

When  $n > 1$ , the adsorption process is favorable and heterogeneous.  $\beta$  represents the heat of adsorption expressed in **Equation S9** and  $b$  is the energy constant in Tempkin isotherm.  $R$  is  $8.314 \text{ J/(K}\cdot\text{mol)}$  and  $T$  is absolute temperature.  $k_T$  is a constant of Tempkin isotherm.

The thermodynamics equations are as follows:

$$\text{Van't Hoff equation: } \ln K_c = \frac{\Delta S^0}{R} - \frac{\Delta H^0}{RT}$$

(Equation.S10)

$$K_c = \frac{q_e}{C_e} \quad \text{Equation.S11}$$

$$\Delta G^0 = -RT \ln K_c \quad \text{Equation.S12}$$

$$\text{Arrhenius equation: } k_2 = k_0 e^{-\frac{E_a}{RT}}$$

(Equation.S13)

Where,  $\Delta S^0$  ( $\text{J mol}^{-1} \text{ K}^{-1}$ ) is entropy change and  $\Delta H^0$  ( $\text{J/mol}$ ) is enthalpy change.  $R$  is  $8.314 \text{ J/(K}\cdot\text{mol)}$  and  $T$  is absolute temperature.  $K_c$  ( $\text{L/g}$ ) is standard thermodynamic equilibrium constant expressed in **equation S11**, where  $C_e$  ( $\text{mg/L}$ ) is the adsorbate concentration in the liquid phase at equilibrium and  $q_e$  ( $\text{mg/g}$ ) is the adsorption capacity at equilibrium.  $\Delta G^0$  ( $\text{J/mol}$ ) is Gibbs free energy change and can be calculated by **Equation S12**.
